# Supplementary material for: Comparison of 15–20 mmHg versus 20–30 mmHg Compression Stockings in Reducing Occupational Oedema in Standing and Seated Healthy Individuals
Source: Int J Vasc Med. 2018 Oct 1;2018:2053985. doi: 10.1155/2018/2053985 (PMC6188858; doi:10.1155/2018/2053985)
Supplement: Supplementary Materials — The data used to support the findings of this study. [file 2053985.f1.zip]

Archive with 3 entries (3 files):
- Combining periods of standing, sitting, walking smilar   proportion of time.xls
- Workers Sitting Position HP.xls
- Workers Standing Position HP (1).xls
