# Supplementary material for: Comparison of 15–20 mmHg versus 20–30 mmHg Compression Stockings in Reducing Occupational Oedema in Standing and Seated Healthy Individuals
Source: Int J Vasc Med. 2018 Oct 1;2018:2053985. doi: 10.1155/2018/2053985 (PMC6188858; doi:10.1155/2018/2053985)
Supplement: Supplementary Materials — The data used to support the findings of this study. [file 2053985.f1.zip › Combining periods of standing, sitting, walking smilar proportion of time.xls]

## Sheet: Plan1
Name	Profession	Age	Weight	Height	CEAP	Gender	Race
					Right Left
ELA	Cleaner	46	62	1.6	C1 C1	F	White
DMS	Cleaner	64	69	1.58	C3 C3	F	White
MGG	Cleaner	61	55	1.5	C1 C1	F	Mulatto
RMVO	Secretary	47	67	1.66	C0 C0	F	Black
MLAB	Secretary	49	68	1.66	C1 C0	F	Mulatto
IM	Secretary	40	68	1.6	C1 C1	F	Mulatto
RNR	Physioterapist	28	65	1.71	C1 C0	F	White
KM	Secretary	23	60	1.65	C0 C0	F	Mulatto
NPT	Secretary	44	69	1.68	C0 C0	F	White
RAD	Secretary	42	42	1.65	C1 C1	F	Mulatto
RCSC	Secretary	42	98	1.68	C2 C2	F	White
LRM	Secretary	42	48	1.58	C0 C0	F	White
CEQB	Doctor	62	60	1.6	C1 C1	F	White
MAO	Physioterapist	44	64	1.57	C1 C1	F	White
VLLM	Secretary	49	63	1.63	C0 C0	F	White
KSMR	Secretary	26	51	1.51	C1 C1	F	White
EB	Secretary	33	56	1.55	C0 C0	F	White
NN	Cleaner	63	80	1.6	C3 C2	F	White
GMST	Cleaner	46	68	1.65	C1 C1	F	White
FT	Secretary	30	60	1.58	C0 C0	F	Mulatto
Volumetry - Without Stockings
Morning		Afternoon		Diference
R	L	R	L	R	L
3280	3320	3390	3380	110+	60+
3370	3330	3470	3460	100+	130+
2620	2560	2680	2680	60+	120+
3030	2900	3100	2990	70+	90+
3380	3430	3580	3540	200+	110+
3610	3560	3700	3720	90+	160+
3010	3060	3080	3150	70+	90+
3380	3380	3450	3480	70+	100+
3580	3550	3680	3660	100+	110+
3560	3480	3730	3610	170+	130+
4080	4000	4390	4340	310+	340+
2950	2980	3050	3070	100+	90+
2930	2920	2970	2980	40+	60+
2990	2960	3070	3070	80+	110+
3060	3040	3160	3120	100+	80+
2860	2850	2860	2850	0+	0+
2850	2850	2880	2880	30+	30+
3430	3270	3470	3300	30+	30+
3290	3330	3400	3390	110+	60+
2950	2980	3050	3070	100+	90+
Volumetry - Elastic Stockings 15-20 mmHg
Morning		Afternoon		Diference
R	L	R	L	R	L
3260	3270	3180	3170	80-	100-
3410	3360	3300	3290	110-	70-
2660	2600	2560	2540	100-	60-
2980	2930	2980	2930	0-	0-
3380	3300	3250	3280	130-	20-
3760	3730	3720	3680	40-	50-
3080	3080	3060	3050	20-	30-
3470	3510	3480	3480	10+	30-
3880	3680	3880	3680	0+	0+
3380	3320	3380	3320	0+	0+
3780	3880	3710	3780	70-	100-
2880	2930	2970	2930	90+	0+
2920	2940	2870	2860	50-	80-
3080	3050	3090	3080	10+	30+
3140	3120	3100	3080	40-	40-
2860	2850	2840	2830	20-	20-
2850	2850	2840	2830	10-	20-
3430	3270	3390	3250	40-	20-
3260	3270	3180	3170	80-	100-
2930	2950	2880	2870	50-	80-
Volumetry - Elastic Stockings 20-30 mmHg
Morning		Afternoon		Diference
R	L	R	L	R	L
3280	3310	3130	3140	150-	170-
3390	3380	3220	3190	170-	190-
2640	2560	2560	2480	80-	80-
3030	3030	2990	2980	40-	50-
3480	3520	3370	3370	110-	150-
3630	3610	3580	3580	50-	30-
3050	3050	2950	2960	100-	110-
3450	3420	3420	3440	30-	80-
3560	3480	3380	3330	180-	150-
3520	3450	3420	3330	100-	120-
3930	4030	3880	3930	50-	100-
2860	2830	2730	2730	130-	100-
2890	2900	2810	2850	80-	50-
3130	3120	3040	3050	90-	70-
3080	3100	3060	3070	20-	30-
2860	2850	2830	2830	30-	20-
2830	2830	2790	2800	40-	30-
3430	3270	3380	3230	50-	40-
3300	3330	3150	3160	150-	170-
2860	2830	2730	2730	130-	100-
