# Supplementary material for: Comparison of 15–20 mmHg versus 20–30 mmHg Compression Stockings in Reducing Occupational Oedema in Standing and Seated Healthy Individuals
Source: Int J Vasc Med. 2018 Oct 1;2018:2053985. doi: 10.1155/2018/2053985 (PMC6188858; doi:10.1155/2018/2053985)
Supplement: Supplementary Materials — The data used to support the findings of this study. [file 2053985.f1.zip › Workers Sitting Position HP.xls]

## Sheet: Plan1
Name	Profession	Age	Weight	Height	CEAP	Gender	Race	R+L Morn	R+L afternoon	Edema	% Vol Change
								3210	3250	40	1.24611
					Right Left			3310	3340	30	0.906344
LO	Manicurist	63	62	1.6	C1 C1	F	Mulatto	3990	4050	60	1.50376
MMB	Manicurist	54	70	1.65	C1 C2	F	White	3810	4100	290	7.61155
MLG	Manicurist	59	85	1.69	C1 C1	F	White	3960	4190	230	5.80808
SEY	Manicurist	44	70	1.54	C1 C1	F	Yellow	4440	4630	190	4.27928
MHN	Manicurist	54	80	1.61	C1 C1	F	White	3690	3760	70	1.89702
RPJ	Escritoire	56	104	1.75	C3 C1	M	White	3880	3970	90	2.31959
NBAR	Escritoire	32	63	1.55	C2 C2	F	Mulatto	3480	3710	230	6.6092
ECSL	Escritoire	40	68	1.62	C2 C2	F	White	4020	4170	150	3.73134
LMG	Escritoire	54	72	1.62	C1 C1	F	Black	3510	3680	170	4.8433
LCS	Escritoire	49	102	1.75	C1 C1	M	Black	4110	4180	70	1.70316
LTL	Escritoire	45	65	1.65	C1 C1	F	White	3240	3320	80	2.46914
MRS	Secretary	31	72	1.64	C1 C1	F	Mulatto	4120	4280	160	3.8835
AAS	Secretary	30	69	1.65	C1 C1	F	Mulatto	4190	4290	100	2.38663
FPS	Secretary	27	77	1.75	C0 C0	F	Mulatto	3300	3470	170	5.15152
IMS	Secretary	24	75	1.75	C1 C1	F	White	3680	3830	150	4.07609
LMG	Secretary	37	62	1.65	C0 C0	F	Black	3760	3930	170	4.52128
DA	Secretary	23	77	1.76	C0 C0	M	White	4020	4180	160	3.9801
MCS	Secretary	42	86	1.73	C1 C1	M	White	2990	3070	80	2.67559
PCS	Secretary	28	92	1.81	C1 C0	M	White	3230	3280	50	1.54799
MGP	Secretary	44	69	1.63	C1 C1	F	White	3310	3380	70	2.1148
								3930	4080	150	3.81679
								3900	4200	300	7.69231
Volumetry - Without Stockings								3980	4180	200	5.02513
Morning		Afternoon		Diference				4690	4690	0	0
R	L	R	L	R	L			3780	3830	50	1.32275
3210	3230	3250	3280	40+	50+			3720	3830	110	2.95699
3310	3310	3340	3380	30+	70+			3420	3680	260	7.60234
3990	3930	4050	4080	60+	150+			4160	4330	170	4.08654
3810	3900	4100	4200	290+	300+			3500	3630	130	3.71429
3960	3980	4190	4180	230+	200+			4080	4230	150	3.67647
4440	4690	4630	4690	190+	0+			3280	3340	60	1.82927
3690	3780	3760	3830	70+	50+			4120	4300	180	4.36893
3880	3720	3970	3830	90+	110+			4200	4300	100	2.38095
3480	3420	3710	3680	230+	260+			3280	3470	190	5.79268
4020	4160	4170	4330	150+	130+			3680	3830	150	4.07609
3510	3500	3680	3630	170+	130+			3760	3920	160	4.25532
4110	4080	4180	4230	70+	150+			3890	4030	140	3.59897
3240	3280	3320	3340	80+	60+			2960	3070	110	3.71622
4120	4120	4280	4300	160+	180+			Comp 15-20		#VALUE!	#VALUE!
4190	4200	4290	4300	100+	100+			3180	2980	-200	-6.28931
3300	3280	3470	3470	170+	190+			3330	3280	-50	-1.5015
3680	3680	3830	3830	150+	150+			3940	3830	-110	-2.79188
3760	3760	3930	3920	170+	160+			4140	3940	-200	-4.83092
4020	3890	4180	4030	160+	140+			3880	3740	-140	-3.60825
2990	2960	3070	3070	80+	110+			4380	4390	10	0.228311
								3500	3510	10	0.285714
								3280	3830	550	16.7683
Volumetry - Elastic Stockings 15-20 mmHg								3550	3480	-70	-1.97183
Morning		Afternoon		DIFERENCE				4050	3980	-70	-1.7284
R	L	R	L	R	L			3510	3380	-130	-3.7037
3180	3210	2980	3030	200-	180-			4080	3850	-230	-5.63725
3330	3320	3280	3250	50-	70-			3150	3020	-130	-4.12698
3940	3930	3830	3840	110-	90-			4300	4250	-50	-1.16279
4140	4080	3940	3900	200-	180-			4130	3960	-170	-4.11622
3880	3880	3740	3750	140-	130-			3320	3210	-110	-3.31325
4380	4530	4390	4380	10+	150-			3760	3560	-200	-5.31915
3500	3700	3510	3600	10+	100-			3880	3830	-50	-1.28866
3280	3720	3830	3630	50-	90-			4080	3990	-90	-2.20588
3550	3550	3480	3450	70-	100-			3080	3090	10	0.324675
4050	4120	3980	3990	70-	130-			3210	3030	-180	-5.60748
3510	3500	3380	3350	100-	120-			3320	3250	-70	-2.10843
4080	3900	3850	3800	230-	100-			3930	3840	-90	-2.29008
3150	3090	3020	3010	130-	80-			4080	3900	-180	-4.41176
4300	4320	4250	4270	50-	50-			3880	3750	-130	-3.35052
4130	4080	3960	4000	170-	80-			4530	4380	-150	-3.31126
3320	3320	3210	3220	110-	100-			3700	3600	-100	-2.7027
3760	3680	3560	3570	100-	110-			3720	3630	-90	-2.41935
3880	3900	3830	3890	50-	10-			3550	3450	-100	-2.8169
4080	3930	3990	3890	90-	40-			4120	3990	-130	-3.15534
3080	3050	3090	3080	10+	30+			3500	3350	-150	-4.28571
								3900	3800	-100	-2.5641
								3090	3010	-80	-2.589
Volumetry - Elastic Stockings 20-30 mmHg								4320	4270	-50	-1.15741
Morning		Afternoon		Diference				4080	4000	-80	-1.96078
R	L	R	L	R	L			3320	3220	-100	-3.01205
3240	3270	2970	3010	270-	260-			3680	3570	-110	-2.98913
3360	3370	3170	3170	190-	200-			3900	3890	-10	-0.25641
4120	4080	3870	3920	250-	160-			3930	3890	-40	-1.01781
4100	4110	3830	3780	270-	230-			3050	3080	30	0.983607
3830	3770	3680	3680	150-	190-			Comp 20-30		#VALUE!	#VALUE!
4490	4530	4240	4280	250-	150-			3240	2970	-270	-8.33333
3730	3630	3380	3400	230-	180-			3360	3170	-190	-5.65476
3690	3630	3450	3480	240-	250-			4120	3870	-250	-6.06796
3480	3500	3360	3340	120-	160-			4100	3830	-270	-6.58537
4150	4180	3980	4010	170-	170-			3830	3680	-150	-3.91645
3510	3500	3360	3320	150-	160-			4490	4240	-250	-5.56793
4430	4300	4080	4050	350-	250-			3730	3380	-350	-9.38338
3480	3500	3330	3290	150-	210-			3690	3450	-240	-6.50407
4360	4340	4210	4100	150-	240-			3480	3360	-120	-3.44828
4490	4460	4310	4290	180-	170-			4150	3980	-170	-4.09639
3580	3610	3300	3340	280-	270-			3510	3360	-150	-4.2735
3930	3910	3800	3830	130-	80-			4430	4080	-350	-7.90068
4130	4230	3900	3890	230-	340-			3480	3330	-150	-4.31034
4360	4090	4100	3990	260-	100-			4360	4210	-150	-3.44037
3130	3120	3040	3050	90-	70-			4490	4310	-180	-4.00891
								3580	3300	-280	-7.82123
								3930	3800	-130	-3.30789
								4130	3900	-230	-5.56901
								4360	4100	-260	-5.9633
								3130	3040	-90	-2.8754
								3270	3010	-260	-7.95107
								3370	3170	-200	-5.93472
								4080	3920	-160	-3.92157
								4110	3780	-330	-8.0292
								3770	3680	-90	-2.38727
								4530	4280	-250	-5.51876
								3630	3400	-230	-6.33609
								3630	3480	-150	-4.13223
								3500	3340	-160	-4.57143
								4180	4010	-170	-4.06699
								3500	3320	-180	-5.14286
								4300	4050	-250	-5.81395
								3500	3290	-210	-6
								4340	4100	-240	-5.52995
								4460	4290	-170	-3.81166
								3610	3340	-270	-7.47922
								3910	3830	-80	-2.04604
								4230	3890	-340	-8.03783
								4090	3990	-100	-2.44499
								3120	3050	-70	-2.24359
