# Supplementary material for: Comparison of 15–20 mmHg versus 20–30 mmHg Compression Stockings in Reducing Occupational Oedema in Standing and Seated Healthy Individuals
Source: Int J Vasc Med. 2018 Oct 1;2018:2053985. doi: 10.1155/2018/2053985 (PMC6188858; doi:10.1155/2018/2053985)
Supplement: Supplementary Materials — The data used to support the findings of this study. [file 2053985.f1.zip › Workers Standing Position HP (1).xls]

## Sheet: Plan1
Name	Age	Weight	Height	CEAP	Gender	Race	Profession	R+ L Morn	R+L aftern	EDEMA	% Vol Change
								3440	3480	40	1.16279
				Right Left				3430	3530	100	2.91545
SMP	47	61	1.6	C0 C0	F	White	Hairdresser	4310	4360	50	1.16009
MMA	48	43	1.55	C1 C0	F	Mulatto	Hairdresser	3370	3560	190	5.63798
CS	38	73	1.58	C1 C1	F	Mulatto	Hairdresser	4290	4340	50	1.1655
NNR	63	80	1.63	C2 C2	F	White	Hairdresser	3780	4370	590	15.6085
HMPB	28	90	1.58	C1 C1	F	White	Hairdresser	3500	3600	100	2.85714
AMM	62	82	1.56	C2 C2	F	White	Hairdresser	2900	3030	130	4.48276
RNR	31	86	1.8	C1 C1	M	White	Hairdresser	3280	3380	100	3.04878
PAS	28	68	1.65	C0 C0	F	Mulatto	Hairdresser	3400	3480	80	2.35294
MFQ	29	58	1.57	C0 C0	F	White	Hairdresser	3720	3860	140	3.76344
VRR	51	61	1.58	C1 C1	F	White	Hairdresser	3580	3580	0	0
LSK	46	75	1.71	C0 C1	M	Yellow	Hairdresser	3140	3240	100	3.18471
SAH	43	72	1.55	C1 C1	F	Yellow	Hairdresser	3230	3260	30	0.928793
KS	30	55	1.54	C2 C2	F	Mulatto	Hairdresser	3360	3480	120	3.57143
LNP	24	57	1.62	C1 C1	F	Black	Hairdresser	3430	3580	150	4.37318
ESR	27	54	1.52	C1 C2	F	Mulatto	Hairdresser	3300	3400	100	3.0303
MVS	47	68	1.6	C1 C1	F	White	Hairdresser	3480	3630	150	4.31034
RS	35	56	1.6	C2 C2	F	White	Hairdresser	3550	3640	90	2.53521
IRP	27	69	1.58	C1 C1	F	White	Hairdresser	3430	3450	20	0.58309
								4350	4360	10	0.229885
VOLUMETRY – Without stockings								3350	3450	100	2.98507
Morning		Afternoon		Diference				4210	4410	200	4.75059
R	L	R	L	R	L			3740	4420	680	18.1818
3440	3550	3480	3640	40+	90+			3410	3520	110	3.22581
3430	3430	3530	3450	100+	20+			3030	3200	170	5.61056
4310	4350	4360	4360	50+	10+			3260	3350	90	2.76074
3370	3350	3560	3450	190+	150+			3410	3460	50	1.46628
4290	4210	4340	4410	50+	70+			3600	3780	180	5
3780	3740	4370	4420	590+	680+			3660	3750	90	2.45902
3500	3410	3600	3520	100+	110+			3130	3230	100	3.19489
2900	3030	3030	3200	130+	170+			3290	3330	40	1.21581
3280	3260	3380	3350	100+	90+			3330	3490	160	4.8048
3400	3410	3480	3460	80+	50+			3380	3550	170	5.02959
3720	3600	3860	3780	140+	80+			3280	3370	90	2.7439
3580	3660	3580	3750	0+	90+			3470	3540	70	2.01729
3140	3130	3240	3230	100+	100+			comp 25-20		#VALUE!	#VALUE!
3230	3290	3260	3330	30+	40+			3410	3330	-80	-2.34604
3360	3330	3480	3490	120+	160+			3430	3230	-200	-5.8309
3430	3380	3580	3550	150+	170+			4240	4170	-70	-1.65094
3300	3280	3400	3370	100+	90+			3350	3280	-70	-2.08955
3480	3470	3630	3540	150+	170+			4160	4080	-80	-1.92308
								3960	3780	-180	-4.54545
Volumetry - Elastic Stockings 15-20 mmHg								3350	3260	-90	-2.68657
Morning		Afternoon		Diference				3010	2950	-60	-1.99336
R	L	R	L	R	L			3380	3130	-250	-7.39645
3410	3480	3330	3430	80-	50-			3230	3190	-40	-1.23839
3430	3430	3230	3320	200-	110-			3630	3560	-70	-1.92837
4240	4260	4170	4180	70-	40-			3470	3430	-40	-1.15274
3350	3290	3280	3220	70-	50-			3230	3030	-200	-6.19195
4160	4160	4080	3960	180-	200-			3180	3050	-130	-4.08805
3960	3950	3780	3790	190-	170-			3140	3010	-130	-4.14013
3350	3260	3260	3230	90-	30-			3460	3380	-80	-2.31214
3010	3000	2950	2970	70-	30-			3300	3130	-170	-5.15152
3380	3380	3130	3140	170-	160-			3480	3420	-60	-1.72414
3230	3230	3190	3180	40-	30-			3480	3430	-50	-1.43678
3630	3630	3560	3580	70-	50-			3430	3320	-110	-3.207
3470	3560	3430	3530	40-	30-			4260	4180	-80	-1.87793
3230	3220	3030	2990	200-	230-			3290	3220	-70	-2.12766
3180	3210	3050	3010	130-	200-			4160	3960	-200	-4.80769
3140	3100	3010	3030	130-	70-			3950	3790	-160	-4.05063
3460	3410	3380	3350	80-	60-			3260	3230	-30	-0.920245
3300	3300	3130	3140	170-	160-			3000	2970	-30	-1
3480	3480	3420	3440	60-	40-			3380	3140	-240	-7.10059
								3230	3180	-50	-1.54799
								3630	3580	-50	-1.37741
Volumetry - Elastic Stockings 20-30 mmHg								3560	3530	-30	-0.842697
Morning		Afternoon		Diference				3220	2990	-230	-7.14286
R	L	R	L	R	L			3210	3010	-200	-6.23053
3440	3480	3380	3400	60-	80-			3100	3030	-70	-2.25806
3380	3390	3180	3230	200-	160-			3410	3350	-60	-1.75953
4280	4300	4210	4220	70-	80-			3300	3140	-160	-4.84848
3420	3330	3320	3180	100-	150-			3480	3440	-40	-1.14943
4300	4280	3930	3880	370-	400-			Comp 20-30		#VALUE!	#VALUE!
3960	4100	3680	3820	280-	280-			3440	3380	-60	-1.74419
3560	3390	3450	3280	110-	110-			3380	3180	-200	-5.91716
3030	3030	2910	2900	120-	130-			4280	4210	-70	-1.63551
3240	3180	3040	3000	200-	180-			3420	3320	-100	-2.92398
3460	3430	3370	3360	90-	80-			4300	3930	-370	-8.60465
3870	3680	3660	3630	210-	100-			3960	3680	-280	-7.07071
3580	3680	3450	3560	130-	120-			3560	3450	-110	-3.08989
3210	2990	2990	2980	220-	190-			3030	2910	-120	-3.9604
3180	3180	2960	2960	220-	220-			3240	3040	-200	-6.17284
3200	3180	3030	3020	170-	160-			3460	3370	-90	-2.60116
3430	3390	3330	3280	100-	110-			3870	3660	-210	-5.42636
3280	3280	3080	3100	200-	180-			3580	3450	-130	-3.63128
3480	3470	3380	3390	110-	90-			3210	2990	-220	-6.85358
								3180	2960	-220	-6.91824
								3200	3030	-170	-5.3125
								3430	3330	-100	-2.91545
								3280	3080	-200	-6.09756
								3480	3380	-100	-2.87356
								3480	3400	-80	-2.29885
								3390	3230	-160	-4.71976
								4300	4220	-80	-1.86047
								3330	3180	-150	-4.5045
								4280	3880	-400	-9.34579
								4100	3820	-280	-6.82927
								3390	3280	-110	-3.24484
								3030	2900	-130	-4.29043
								3180	3000	-180	-5.66038
								3430	3360	-70	-2.04082
								3680	3630	-50	-1.3587
								3680	3560	-120	-3.26087
								2990	2980	-10	-0.334448
								3180	2960	-220	-6.91824
								3180	3020	-160	-5.03145
								3390	3280	-110	-3.24484
								3280	3100	-180	-5.4878
								3470	3390	-80	-2.30548
